# Supplementary material for: Elucidating the contributions of multiple aldehyde/alcohol dehydrogenases to butanol and ethanol production in Clostridium acetobutylicum
Source: PubMed Central journal article supplement (PMC4913296; doi:10.1038/srep28189), 2016-06-20
Supplement: srep28189-s1.pdf [file srep28189-s1.pdf]

**Elucidating the contributions of multiple aldehyde/alcohol dehydrogenases to butanol and ethanol production in *Clostridium acetobutylicum***

Zongjie Dai<sup>1,2,3</sup>, Hongjun Dong<sup>1</sup>, Yanping Zhang<sup>1\*</sup>, Yin Li<sup>1</sup>

<sup>1</sup>CAS Key Laboratory of Microbial Physiological and Metabolic Engineering, Institute of Microbiology, Chinese Academy of Sciences, Beijing, 100101, China

<sup>2</sup>Department of Biochemistry and Molecular Biology, University of Science and Technology of China, Hefei, 230026, China

<sup>3</sup>Present address: Department of Biology and Biological Engineering, Chalmers University of Technology, Gothenburg, SE-412 96, Sweden

\*Correspondence: zhangyp@im.ac.cn

**Table S1** Primers used in this study

| Primers                      | Sequence (5'-3')                                                  | Source     |
|------------------------------|-------------------------------------------------------------------|------------|
| EBS Universal                | CGAAATTAGAACTTGC GTTCAGTAAAC                                      | This study |
| 007-R1                       | AGGGTATCCCAGTTAGTGTTAAGTCTTGG                                     | This study |
| <i>adhE1</i> -807/808s-IBS   | AAAAAAGCTTATAATTATCCTTAGAAAG<br>AGGAGCTGTGCGCCAGATAGGGTG          | This study |
| <i>adhE1</i> -807/808s-EBS1d | CAGATTGTACA AATGTGGTGATAACAGATA<br>AGTCGGAGCTTATAACTTACCTTTCTTTGT | This study |
| <i>adhE1</i> -807/808s-EBS2  | TGAACGCAAGTTTCTAATTCGGTT<br>CTTTCTCGATAGAGGAAAGTGTCT              | This study |
| <i>adhE1</i> -intron check   | ATAATTATCCTTAATACTTGATGCA                                         | This study |
| <i>adhE1</i> -1              | ATGAAAGTCACAACAGTAAAGGAAT                                         | This study |
| <i>adhE1</i> -2              | TTAAGGTTGTTTTTAAAACAATTT                                          | This study |
| <i>adhE2</i> -846/847s-IBS   | AAAAAAGCTTATAATTATCCTTAAAAAT<br>AAAAGAAGTGCGCCAGATAGGGTG          | This study |
| <i>adhE2</i> -846/847s-EBS1d | CAGATTGTACA AATGTGGTGATAACAGATA<br>AGTCAAAGAACTA ACTTACCTTTCTTTGT | This study |
| <i>adhE2</i> -846/847s-EBS2  | TGAACGCAAGTTTCTAATTCGGTTA<br>TTTTTCGATAGAGGAAAGTGTCT              | This study |
| <i>adhE2</i> -intron check   | TGTGGTGATAACAGATAAGTCAAAGAAAC                                     | This study |
| <i>adhE2</i> -1              | CGCGGATCCATGAAAGTTACAAATCAAAAAGAAC                                | This study |
| <i>adhE2</i> -2              | CGCGGCGCCTTAAAATGATTTTATATAGATATCC                                | This study |
| <i>bdhA</i> -133/134s-IBS    | AAAAAAGCTTATAATTATCCTTAGTATA<br>AAAAGGAGTGCGCCAGATAGGGTG          | This study |
| <i>bdhA</i> -133/134s-EBS1d  | CAGATTGTACA AATGTGGTGATAACAGATA<br>AGTCAAAGGAACTA ACTTACCTTTCTTTG | This study |
| <i>bdhA</i> -133/134s-EBS2   | TGAACGCAAGTTTCTAATTCGGTTA<br>TACTCGATAGAGGAAAGTGTCT               | This study |

|                             |                                                                           |            |
|-----------------------------|---------------------------------------------------------------------------|------------|
| <i>bdhA</i> -intron check   | GTGATAACAGATAAGTCAAAGGAAC                                                 | This study |
| <i>bdhA</i> -1              | GAGTGCTTATAGTTTATGGCGGAGG                                                 | This study |
| <i>bdhA</i> -2              | CATGTCCCATGTATCGCCATCATAA                                                 | This study |
| <i>bdhB</i> -669/670s-IBS   | AAAAA <u>AGCTT</u> TATAATTATCCTTATTA<br>TTAAGAACTGTGCGCCCAGATAGGGTG       | This study |
| <i>bdhB</i> -669/670s-EBS1d | CAGATT <u>GTACA</u> AATGTGGTGATAACAGAT<br>AAGTCGAACTTGTAACCTTACCTTTCTTTG  | This study |
| <i>bdhB</i> -669/670s-EBS2  | TGAACGCAAGTTTCTAATTTTCGGTTAA<br>TAATCGATAGAGGAAAGTGTCT                    | This study |
| <i>bdhB</i> -intron check   | GTGATAACAGATAAGTCAGAACTTG                                                 | This study |
| <i>bdhB</i> -1              | GCAGCAGGAACAGCTGATATTATGA                                                 | This study |
| <i>bdhB</i> -2              | CTACGCCGTGTGTTATGTCGTAATA                                                 | This study |
| cac3392-405/406s-IBS        | AAAAA <u>AGCTT</u> TATAATTATCCTTAGTGCC<br>ACTTGGAGTGCGCCCAGATAGGGTG       | This study |
| cac3392-405/406s-EBS1d      | CAGATT <u>GTACA</u> AATGTGGTGATAACAGATA<br>AGTCCTTGGAACCTAACTTACCTTTCTTTG | This study |
| cac3392-405/406s-EBS2       | TGAACGCAAGTTTCTAATTTTCGGTTG<br>GCACTCGATAGAGGAAAGTGTCT                    | This study |
| cac3392-intron check        | GTGATAACAGATAAGTCCTTGGAAC                                                 | This study |
| cac3392-1                   | GAATTTGGAGGAATTGAACCTAATC                                                 | This study |
| cac3392-2                   | CTCAAGCACATGAACAAATGTATCT                                                 | This study |
| cap0059-150/151s-IBS        | AAAAA <u>AGCTT</u> TATAATTATCCTTAAAAA<br>AGGTCTTAGTGCGCCCAGATAGGGTG       | This study |
| cap0059-150/151s-EBS1d      | CAGATT <u>GTACA</u> AATGTGGTGATAACAGA<br>TAAGTCGTCTTAGTTAACTTACCTTTCTTTG  | This study |
| cap0059-150/151s-EBS2       | TGAACGCAAGTTTCTAATTTTCGGTTT<br>TTTTTCGATAGAGGAAAGTGTCT                    | This study |
| cap0059-intron check        | GTGATAACAGATAAGTCGTCTTAGT                                                 | This study |

---

|                |                           |            |
|----------------|---------------------------|------------|
| cap0059-1      | GGCTCAAAGACTTCTTCCTTGGCGT | This study |
| cap0059-2      | CTTAGCGCAGTCCATTACAGAACCA | This study |
| Intron-Probe-1 | GTTATCACCACATTTGTACAA     | This study |
| Intron-Probe-2 | ACGCGTCGCCACGTAATAAATATC  | This study |

---

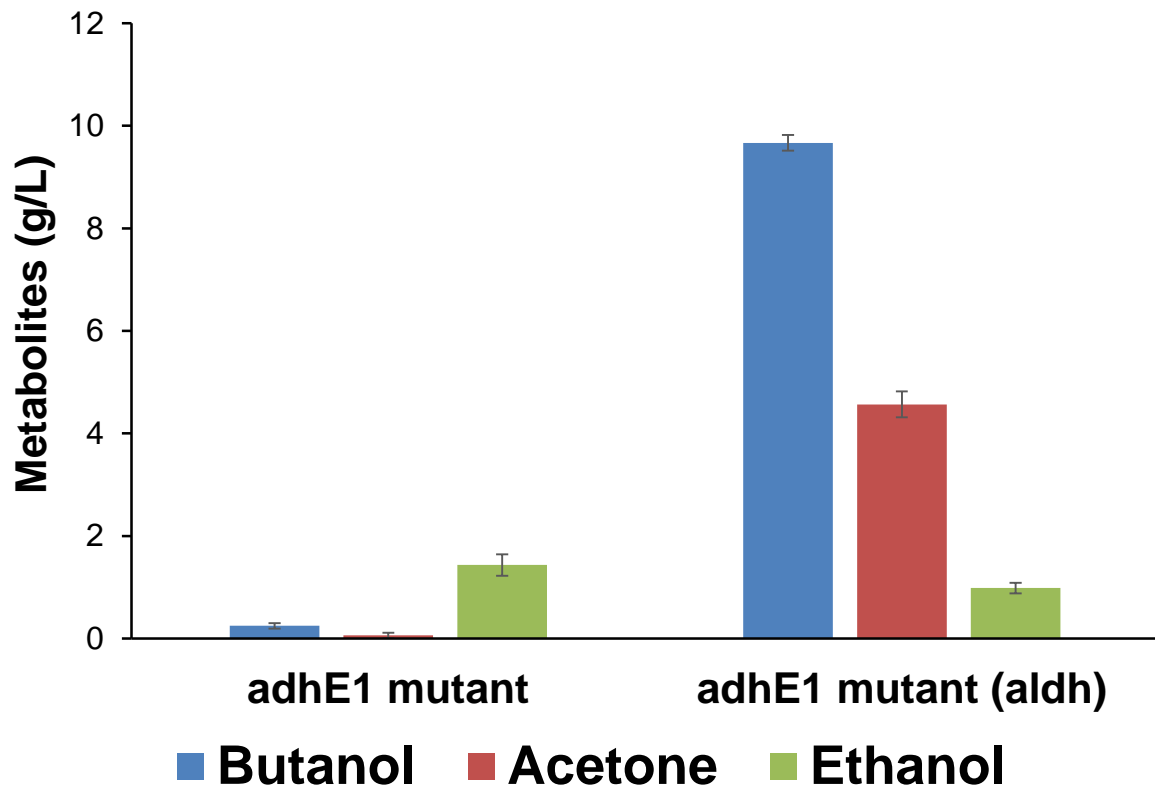

Figure S1. Solvent production profiles of *adhE1* mutant strain and *adhE1* mutant strain with aldehyde dehydrogenase (*aldh*)

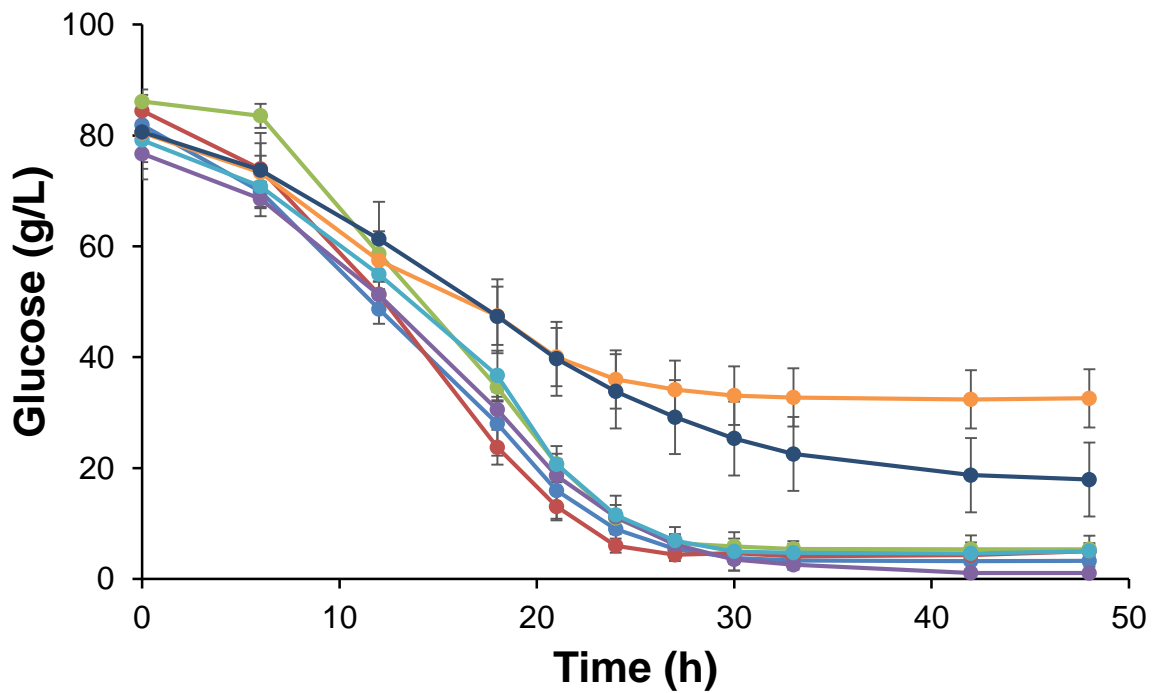

- DSM 1731
- adhe2 mutant
- SMB\_P058 mutant
- yqhD mutant
- bdhA mutant
- adhe1 mutant
- bdhB mutant

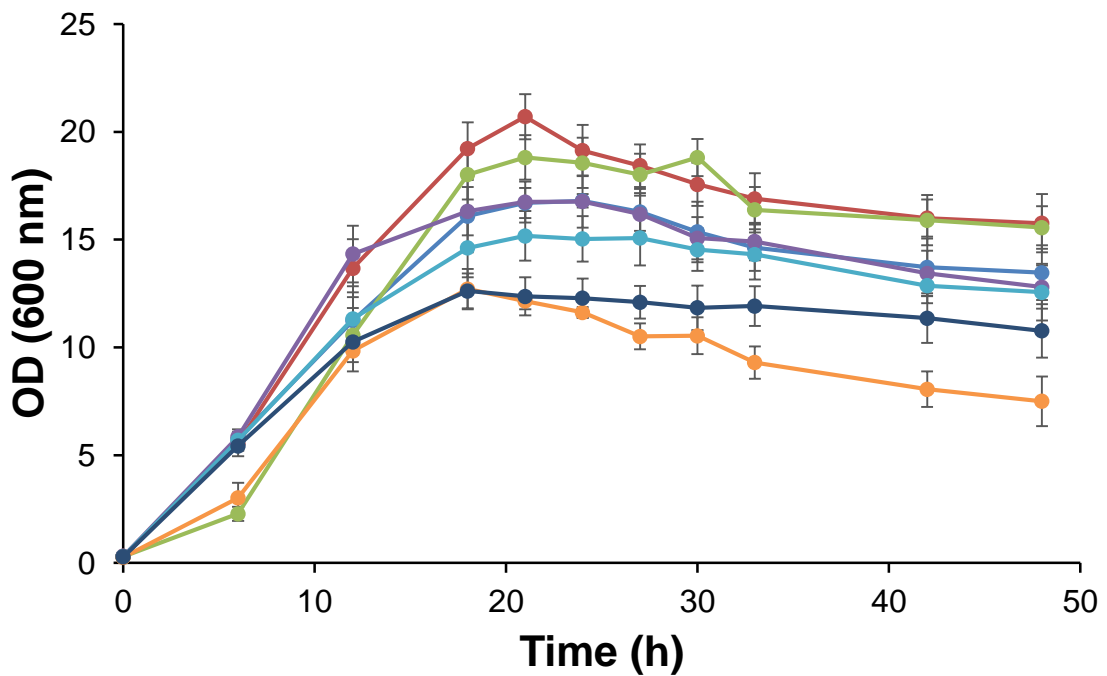

- DSM 1731
- adhe2 mutant
- SMB\_P058 mutant
- yqhD mutant
- bdhA mutant
- adhe1 mutant
- bdhB mutant

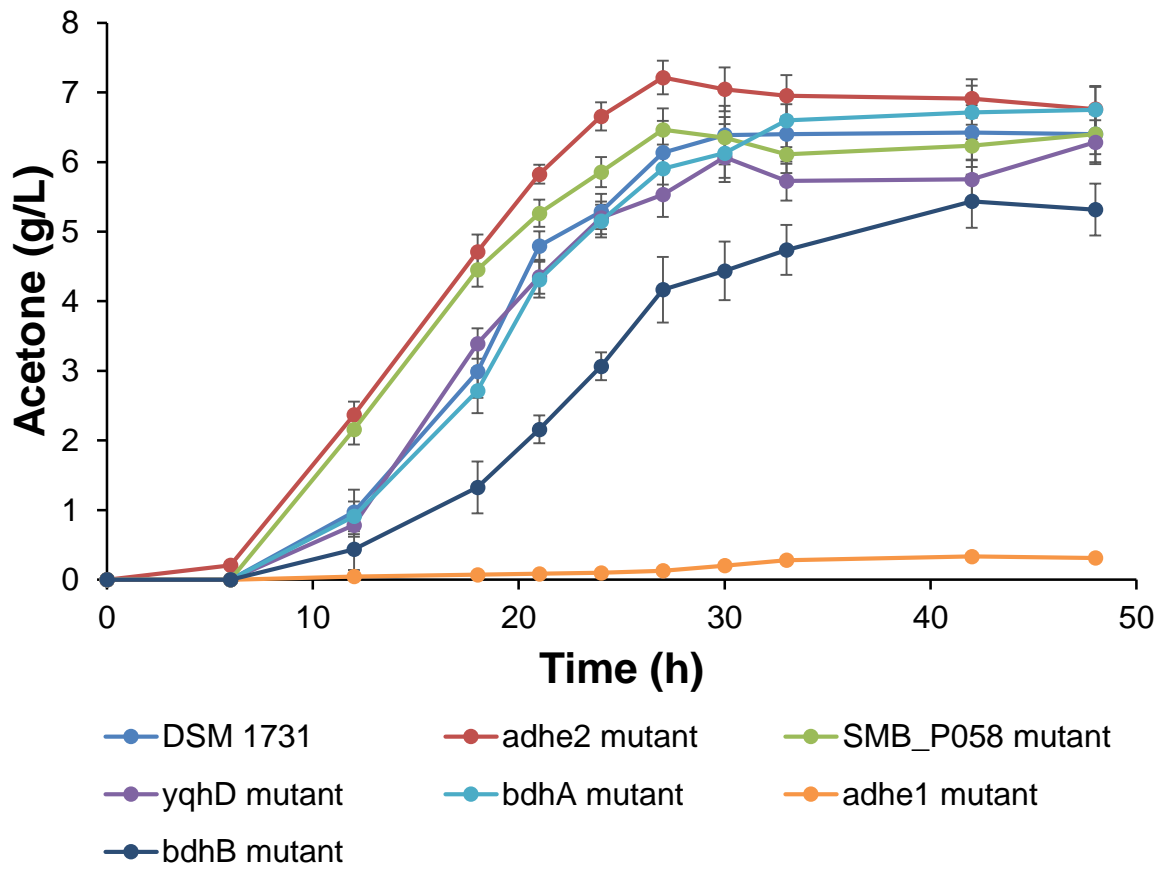

**Figure S2. Glucose consumption, cell growth and acetone production of control strain and different mutant strains.**
